# Supplementary material
Source: PubMed Central journal article supplement (PMC6731424)
Supplement: ajtr0011-4909-f7.pdf [file ajtr0011-4909-f7.pdf]

## GAS5-AS1 inhibits CC growth and metastasis

| Score         | Expect                                  | Identities  | Gaps     | Strand    |
|---------------|-----------------------------------------|-------------|----------|-----------|
| 80.5-bits(43) | 3e-19                                   | 43/43(100%) | 0/43(0%) | Plus/Plus |
| Query 652     | GAUGGAUUGCAAAAAUUUAAAAUUGGAGACACUGUUUaa | 694         |          |           |
|               |                                         |             |          |           |
| Subject 637   | GAUGGAUUGCAAAAAUUUAAAAUUGGAGACACUGUUUAA | 595         |          |           |

**Figure S1.** Regions of putative interaction between GAS5-AS1 (query) and GAS5 (subject).

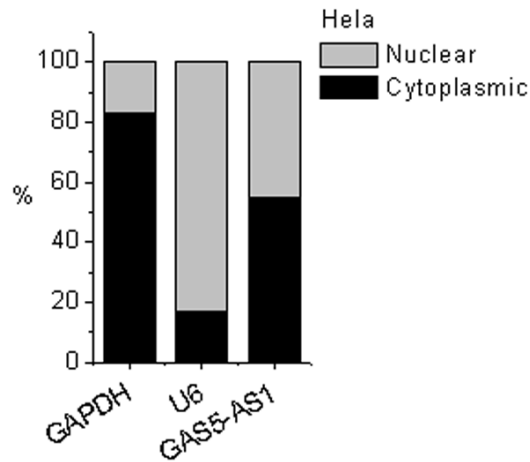

**Figure S2.** The subcellular location of GAS5-AS1.

GUCUUUUCGAGGUAGGAGUCGACUCCUGUGAGGUUUGGUGCUGGGUGCAGAUGCAGUGUGGCUCUGGAU  
 AGCACC UUAUGGACAGUUGUGUCCCCAAGGAAGGAUGAGAAUAGCUACUGAAGUCCUAAAAGAGCAAGCC  
 UAACUCAAGCCAUUGGCACACAGGCAUAGACAGAAAGCUGGAAGUUGAAAUGGGUGGAGUCCAACUUGC  
 CUGGACCAGCUUAAUGGUUCUGCUCCUGGUAACGUUUUUUAUCCAUGGAUGACUUGCUUGGGUAAGGACA  
 UGAAGACAGUCCUGUCAUACCUUUUAAAAGGUAUGGAGAGUCGGCUUGACUACACUGUGGAGCAAGU  
 UUUAAAAGAAGCAAGGACUCAGAAUUCAUGAUUGAAGAAAUGCAGGCAGACCUGUUAUCCUAAACUAGG  
 GUUUUAAUGACCACAACAAGCAAGCAUGCAGCUUACUGCUUGAAAGGGUCUUGCCUCACCCAAGCUAG  
 AGUGCAGUGGCCUUUGAAGCUUACUACAGCCUCAACUUCUGGGCUCAAGUGAUCCUCAGCCUCCCAGU  
 GGUCUUUGUAGACUGCCUGAUGGAGUCUCAUGGCACAAGAAGAUUAAAACAGUGUCUCCAAUUUAAUA  
 AAUUUUUGCAAUCCAUCAAAAAAAAAAAAAAAAAAAA

**Figure S3.** The 5'-RRACU-3' (methylated adenosine residue is underscored) m6A consensus sequence within the GAS5.
